# Supplementary material for: Surface Modification of Carbon Nanotubes with an Enhanced Antifungal Activity for the Control of Plant Fungal Pathogen
Source: MDPI journal article supplement (doi:10.3390/ma10121375), 2017-11-30
Supplement: s1 [file s1]

Supplementary

# Surface Modification of Carbon Nanotubes with an Enhanced Antifungal Activity for the Control of Plant Fungal Pathogen

Xiuping Wang <sup>1</sup>, Zilin Zhou <sup>2</sup> and Fangfang Chen <sup>2,\*</sup>

<sup>1</sup> College of Life Science and Technology, Hebei Normal University of Science and Technology, Qinhuangdao 066000, China; wangxiuping0721@163.com

<sup>2</sup> CAS Key Laboratory of Plant Germplasm Enhancement and Specialty Agriculture, Wuhan Botanical Garden, Chinese Academy of Sciences, Wuhan 430074, China; zhouzilin16@mails.ucas.ac.cn

\* Correspondence: chenff@wbcas.cn

Received: 3 November 2017; Accepted: 28 November 2017; Published: 30 November 2017

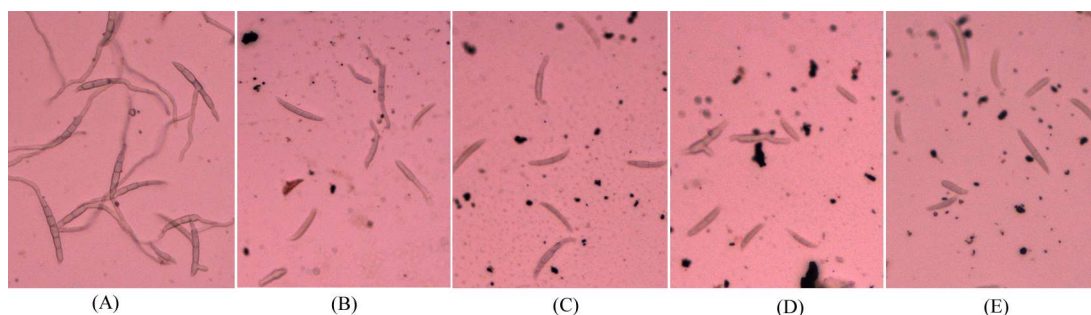

**Figure S1.** Microscopic images of MWCNTs on germination rate of spores. Spores were germinated on distilled water at 28 °C in darkness (A) and at 500 µg mL<sup>-1</sup> of (B) MWCNTs, (C) MWCNTs-COOH, (D) MWCNTs-OH and (E) MWCNTs-NH<sub>2</sub> dispersions. Germination was evaluated after incubation for 5 h. Error bars represent the standard deviation (N = 4).

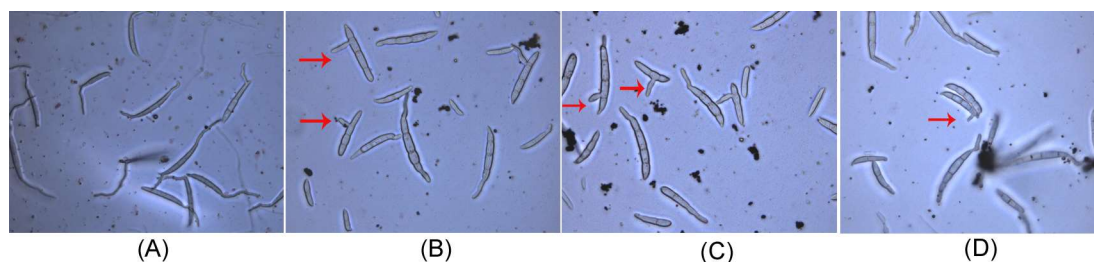

**Figure S2.** Microscopic images of MWCNTs on germination pattern of spores. (A) spores untreated and (B–D) treated with 500 µg mL<sup>-1</sup> of MWCNTs-COOH, MWCNTs-OH and MWCNTs-NH<sub>2</sub>, respectively. The red arrows indicate the germ tubes of the spores developed from the side of spores.
